# Supplementary material for: 6,13-Dicyano pentacene-2,3:9,10-bis(dicarboximide) for solution-processed air-stable n-channel field effect transistors and complementary circuit
Source: Royal Society of Chemistry journal article supplement (doi:10.1039/c2tc00033d), 2012-10-22
Supplement: c2tc00033d.pdf [file c2tc00033d.pdf]

*Electronic Supplementary Information for*

**6,13-Dicyano pentacene-2,3:9,10-bis(dicarboximide) for  
solution-processed air-stable n-channel field effect  
transistors and complementary circuit**

**Jingjing Chang,<sup>a</sup> Hemi Qu,<sup>a</sup> Zi-En OOI,<sup>b</sup> Jie Zhang,<sup>b</sup> Zhikuan Chen,<sup>b</sup>  
Jishan Wu<sup>ab</sup> and Chunyan Chi\*<sup>a</sup>**

*<sup>a</sup>Department of Chemistry, National University of Singapore, 3 Science  
Drive 3, Singapore 117543, E-mail: [chmcc@nus.edu.sg](mailto:chmcc@nus.edu.sg)*

*<sup>b</sup>Institute of Materials Research and Engineering, A\*Star, 3 Research  
Link, Singapore 117602*

## 1. Fluorescence spectrum of compound 1

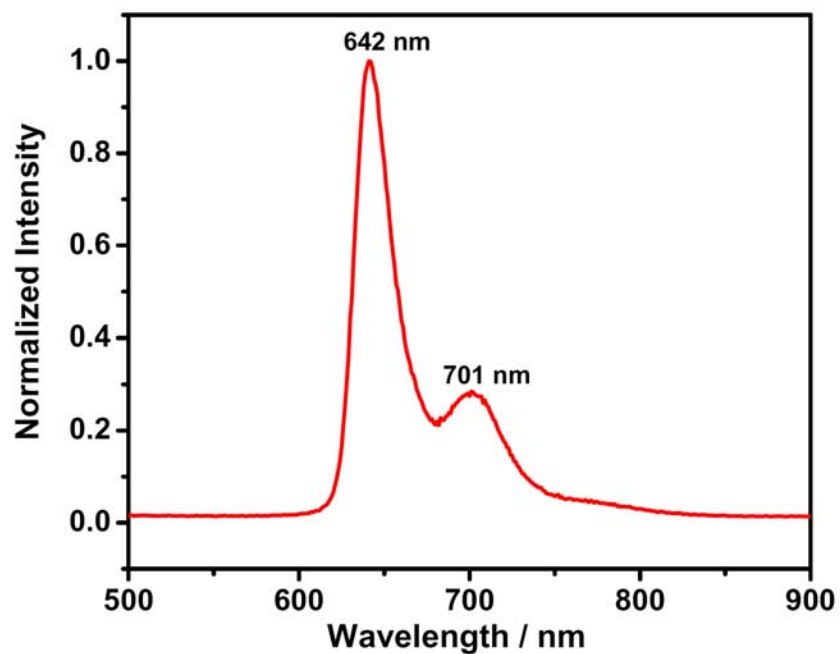

**Fig. S1** Fluorescence spectrum of compounds **1** in  $\text{CHCl}_3$  ( $1 \times 10^{-6}$  M). Excitation wavelength is 361 nm.

## 2. Thermal behavior of compound 1

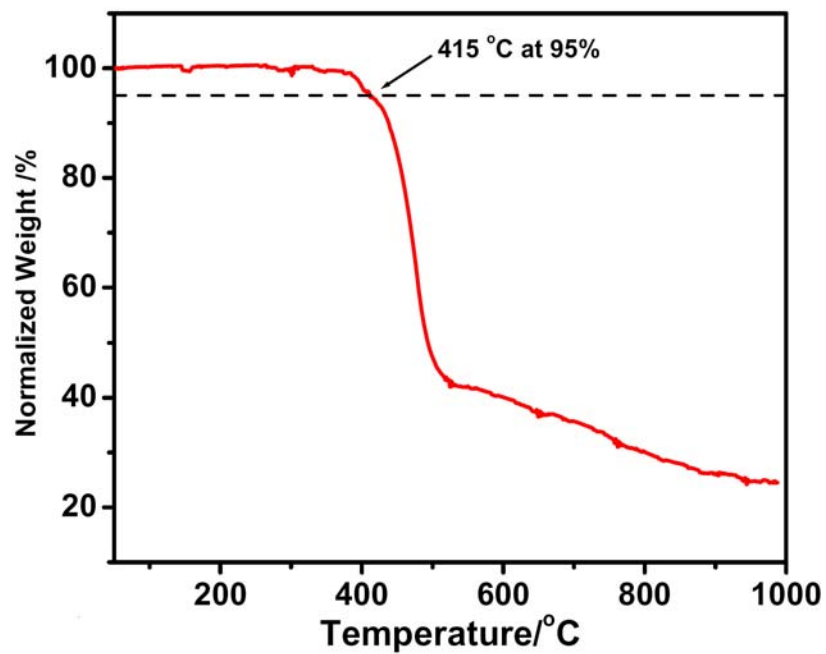

**Fig. S2** Thermogravimetric analysis curve of compound **1** under nitrogen.

### 3. Additional morphological and electrical characterizations

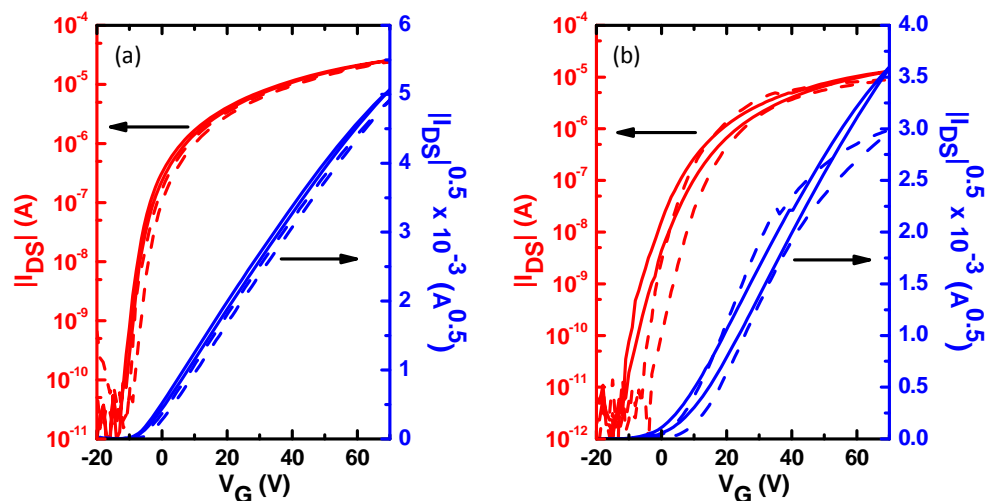

**Figure S3.** Transfer plots ( $V_D = 70$  V) for a fresh device (solid line) and after 6 months storage in  $N_2$  (a) or air (b). (a) The devices were tested in  $N_2$ ; (b) the devices were tested in air.

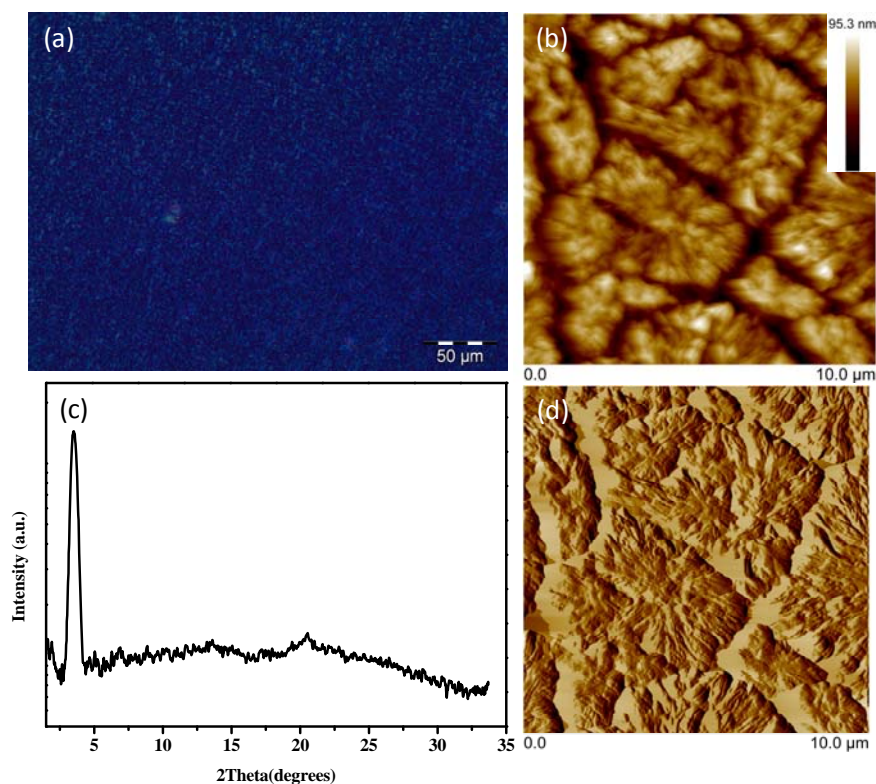

**Fig. S4** (a) Polarized optical microscopy image of drop casted thin film from DCB solution; (b, d) tapping-mode AFM images of the thin film from DCB solution; (c) X-ray diffraction of the thin film in logarithmic scale.

#### 4. $^1\text{H}$ NMR and $^{13}\text{C}$ NMR spectra of compounds **5**, **6**, **8** and **1**.

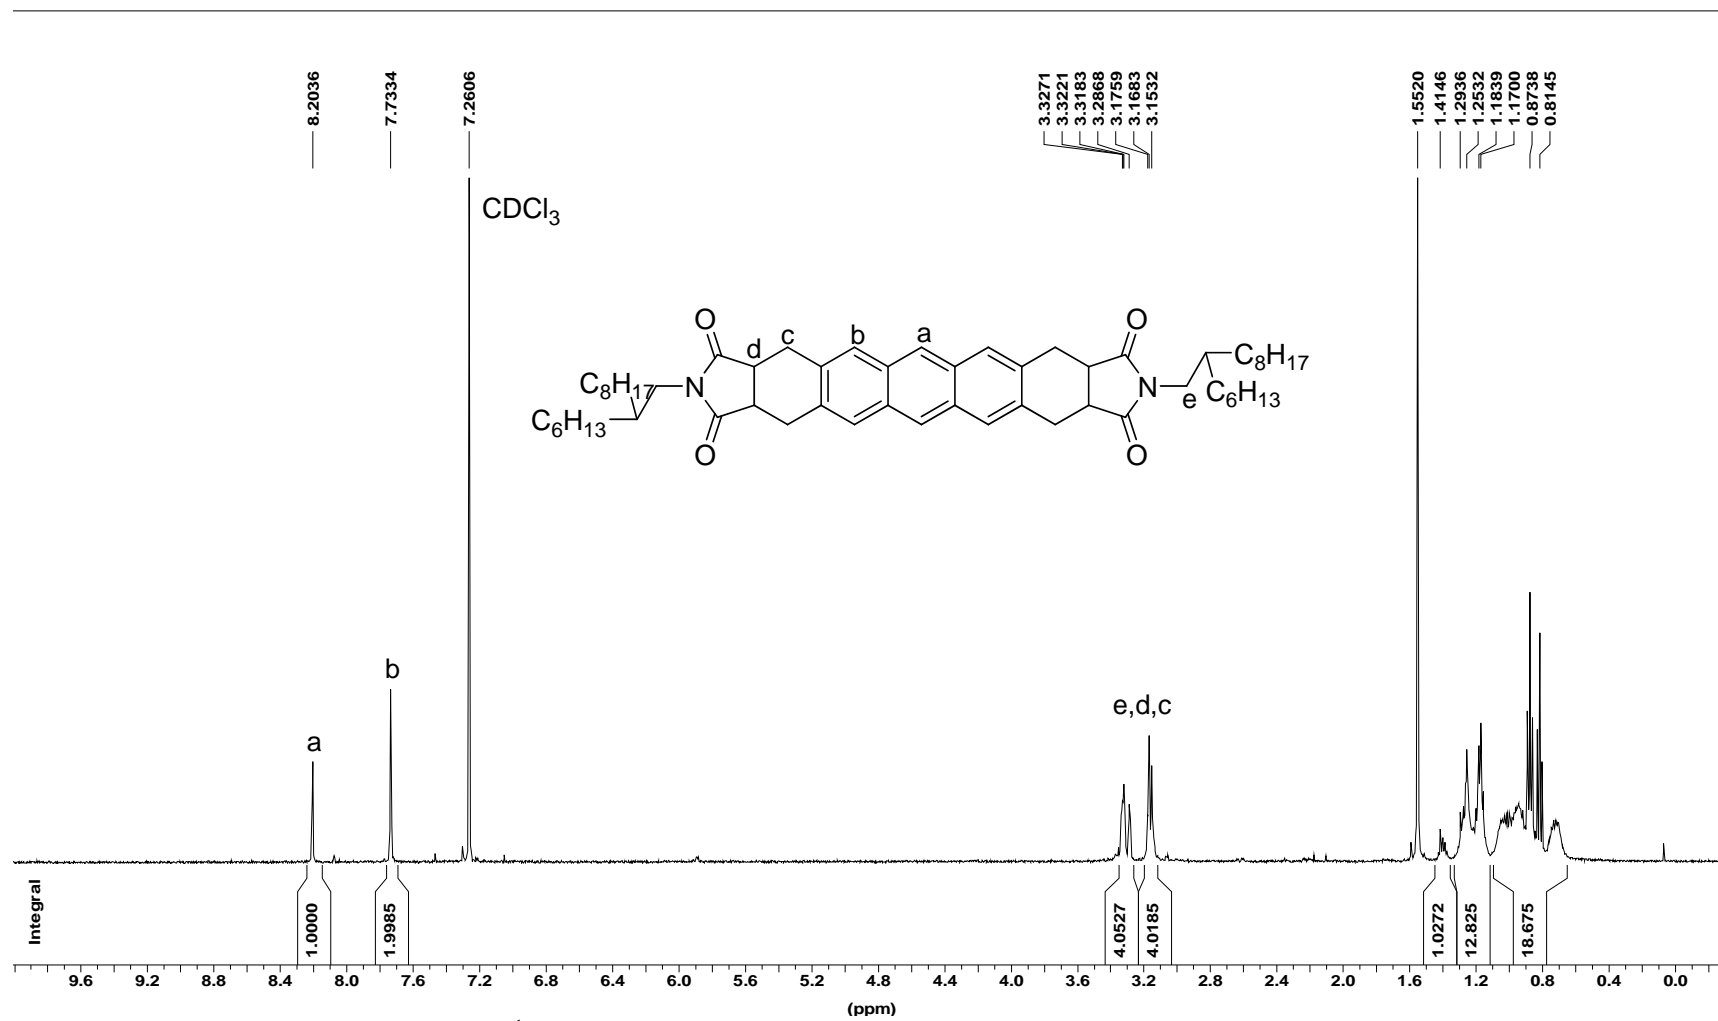

$^1\text{H}$  NMR (500 MHz) spectrum of compound **5** in  $\text{CDCl}_3$

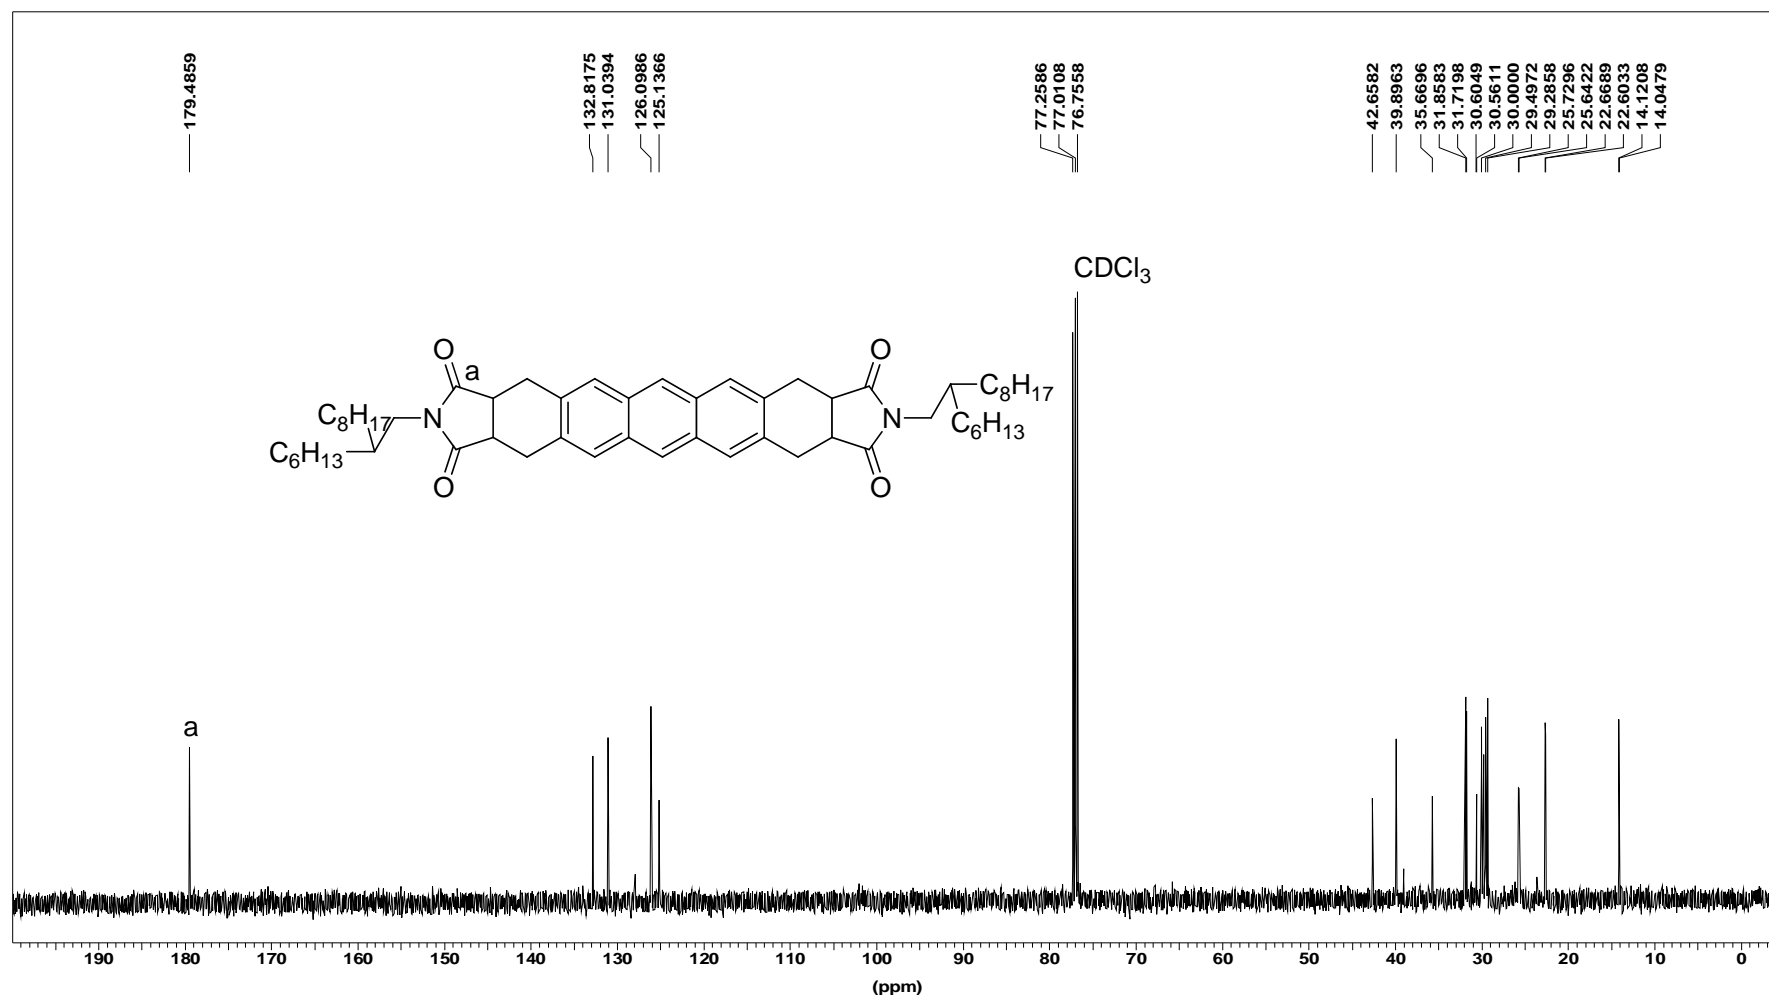

$^{13}\text{C}$  NMR (125 MHz) spectrum of compound **5** in  $\text{CDCl}_3$

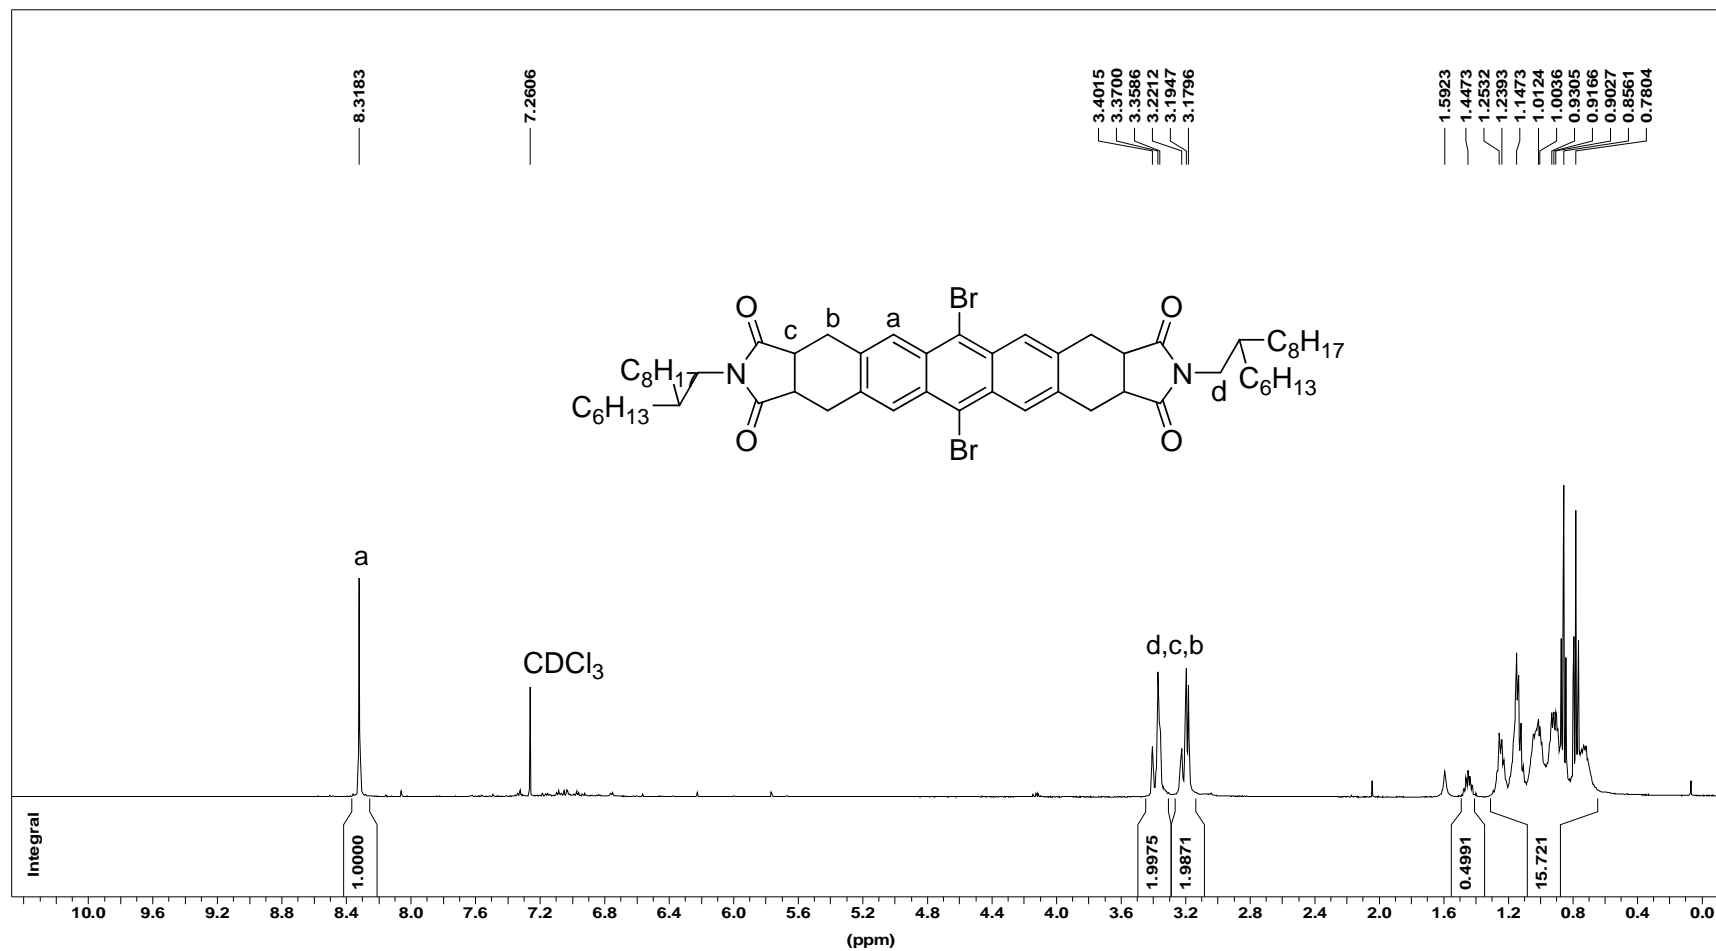

<sup>1</sup>H NMR (500 MHz) spectrum of compound **6** in CDCl<sub>3</sub>

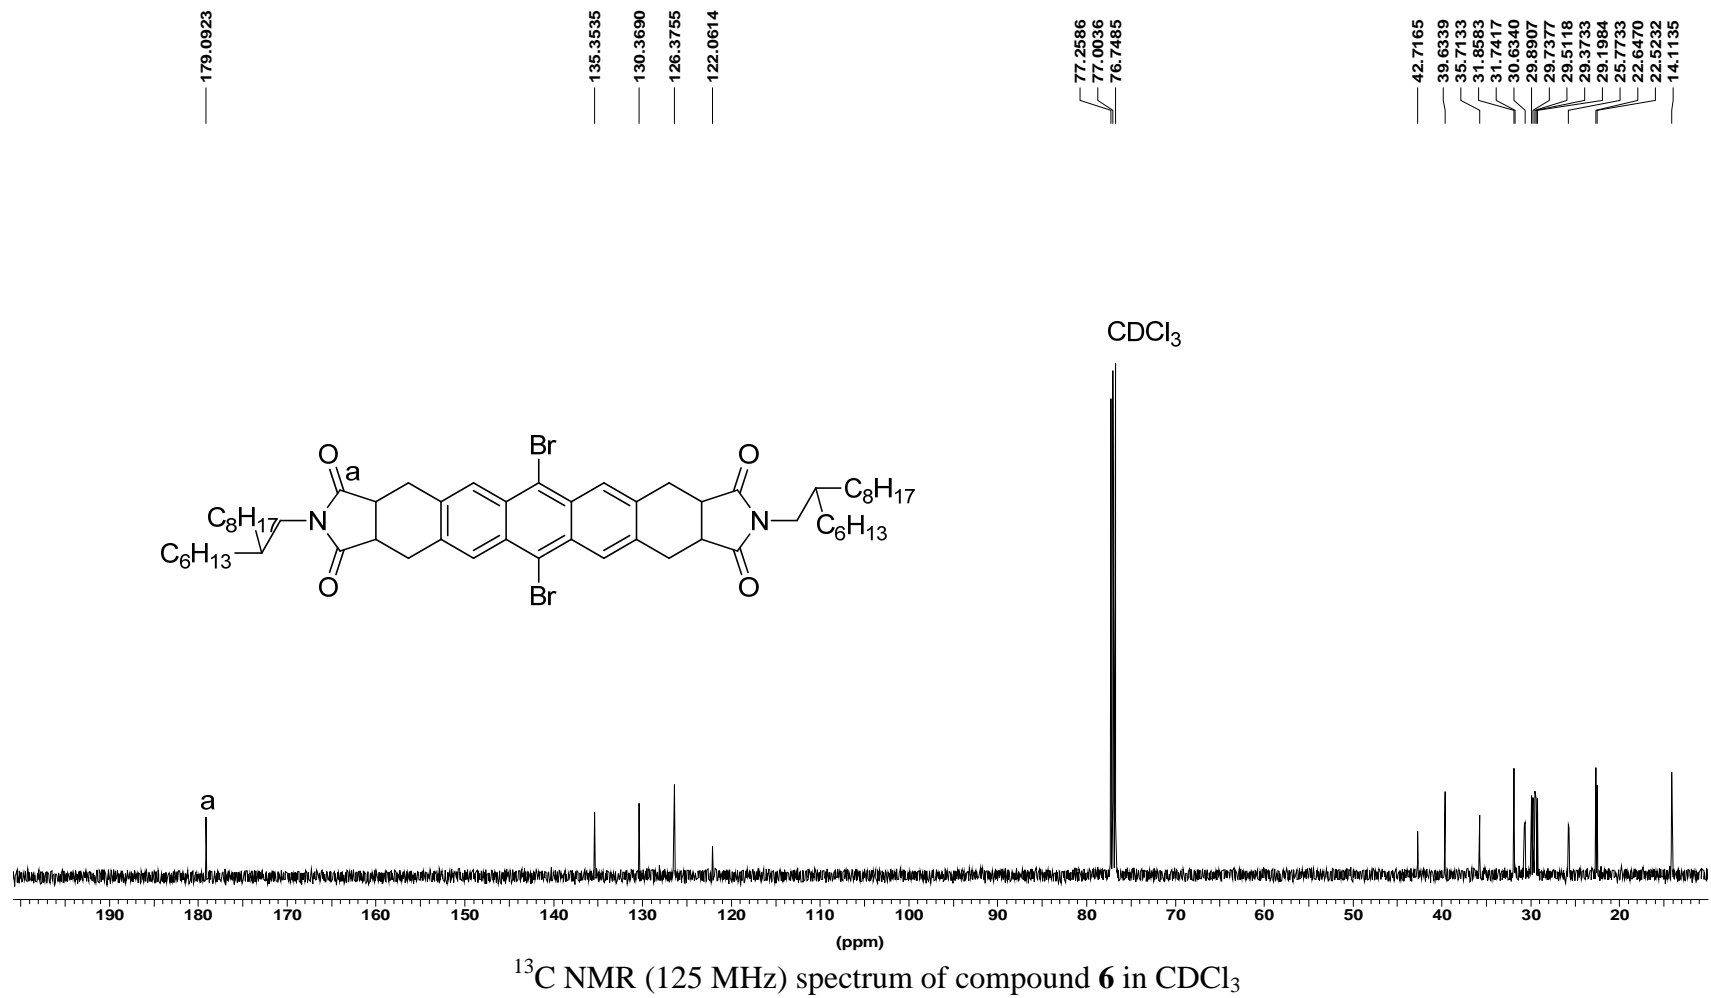

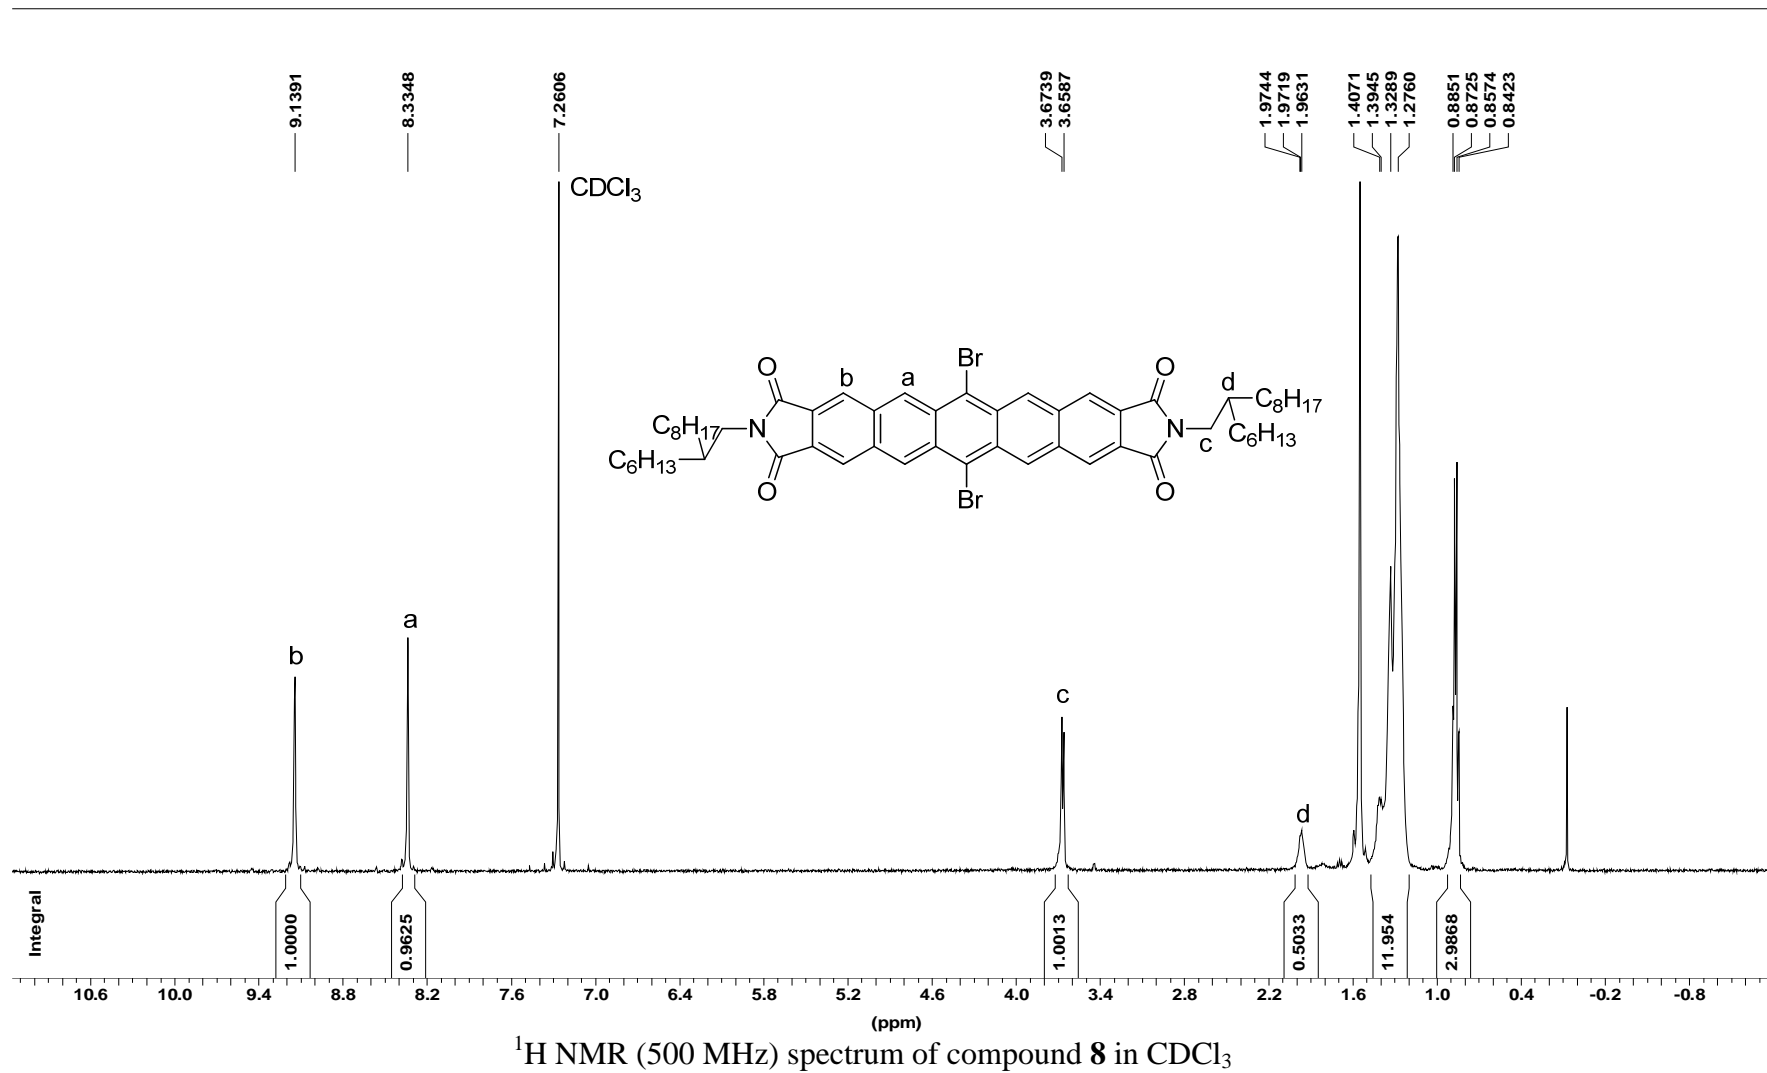



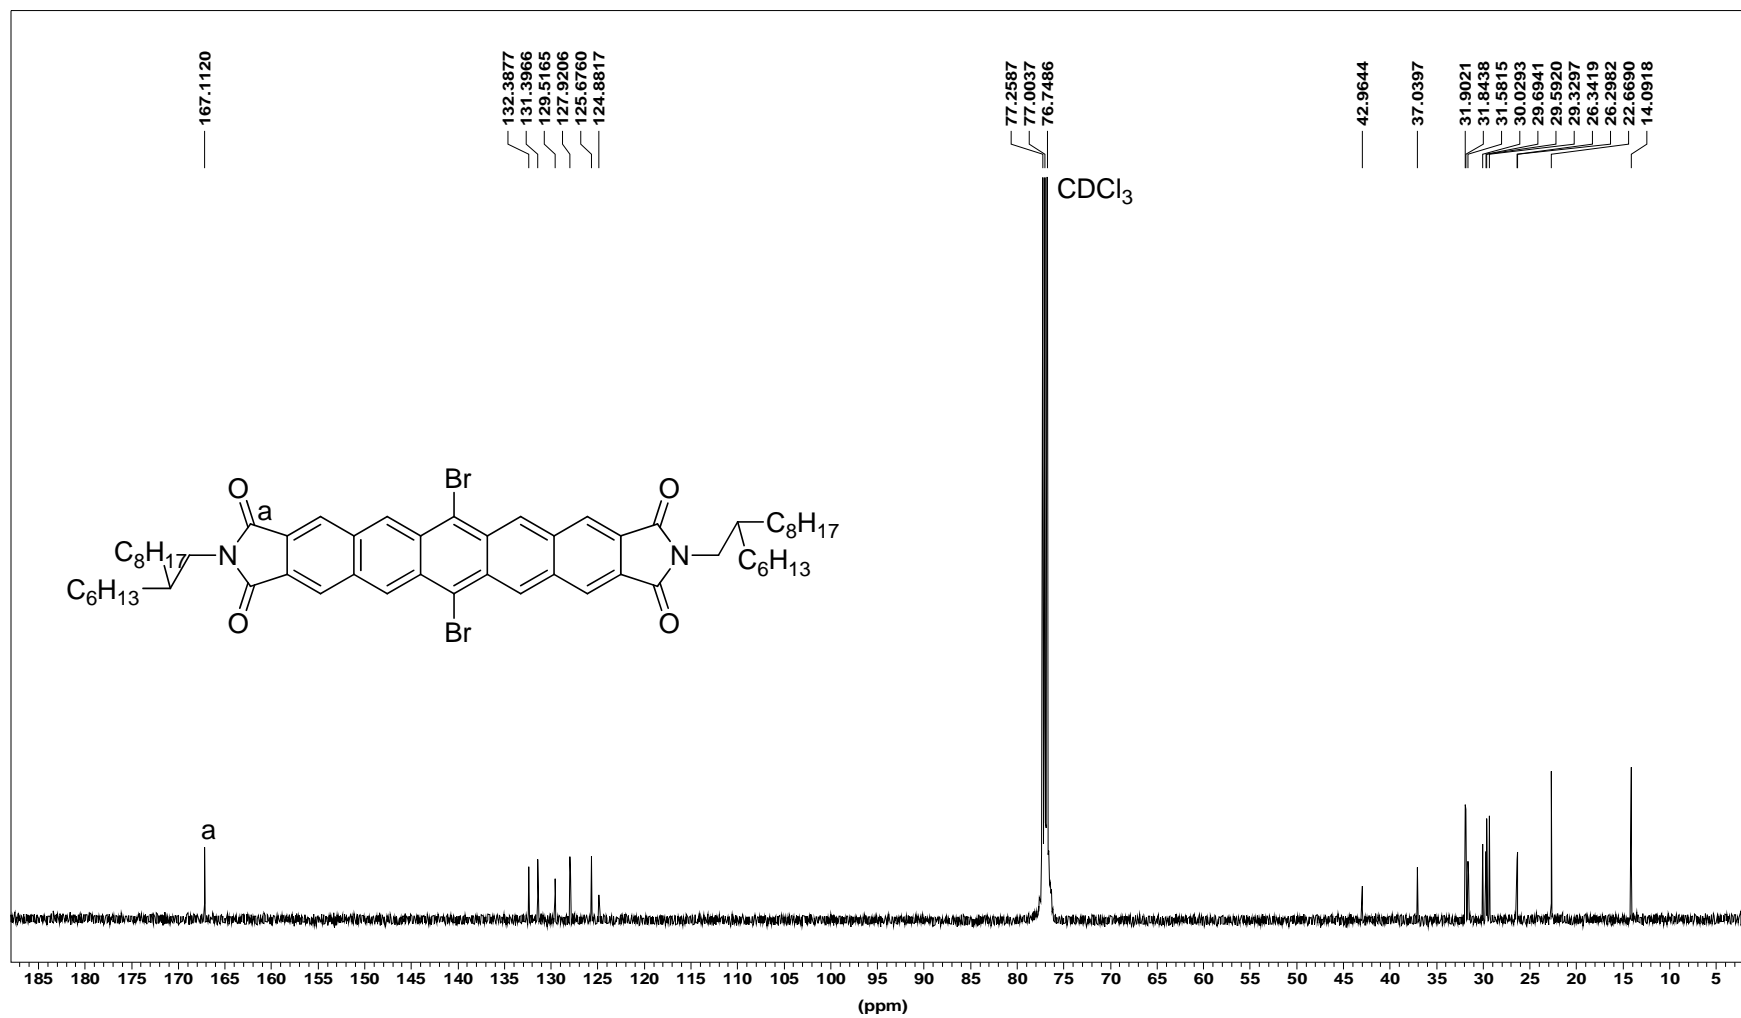

<sup>13</sup>C NMR (125 MHz) spectrum of compound **8** in CDCl<sub>3</sub>

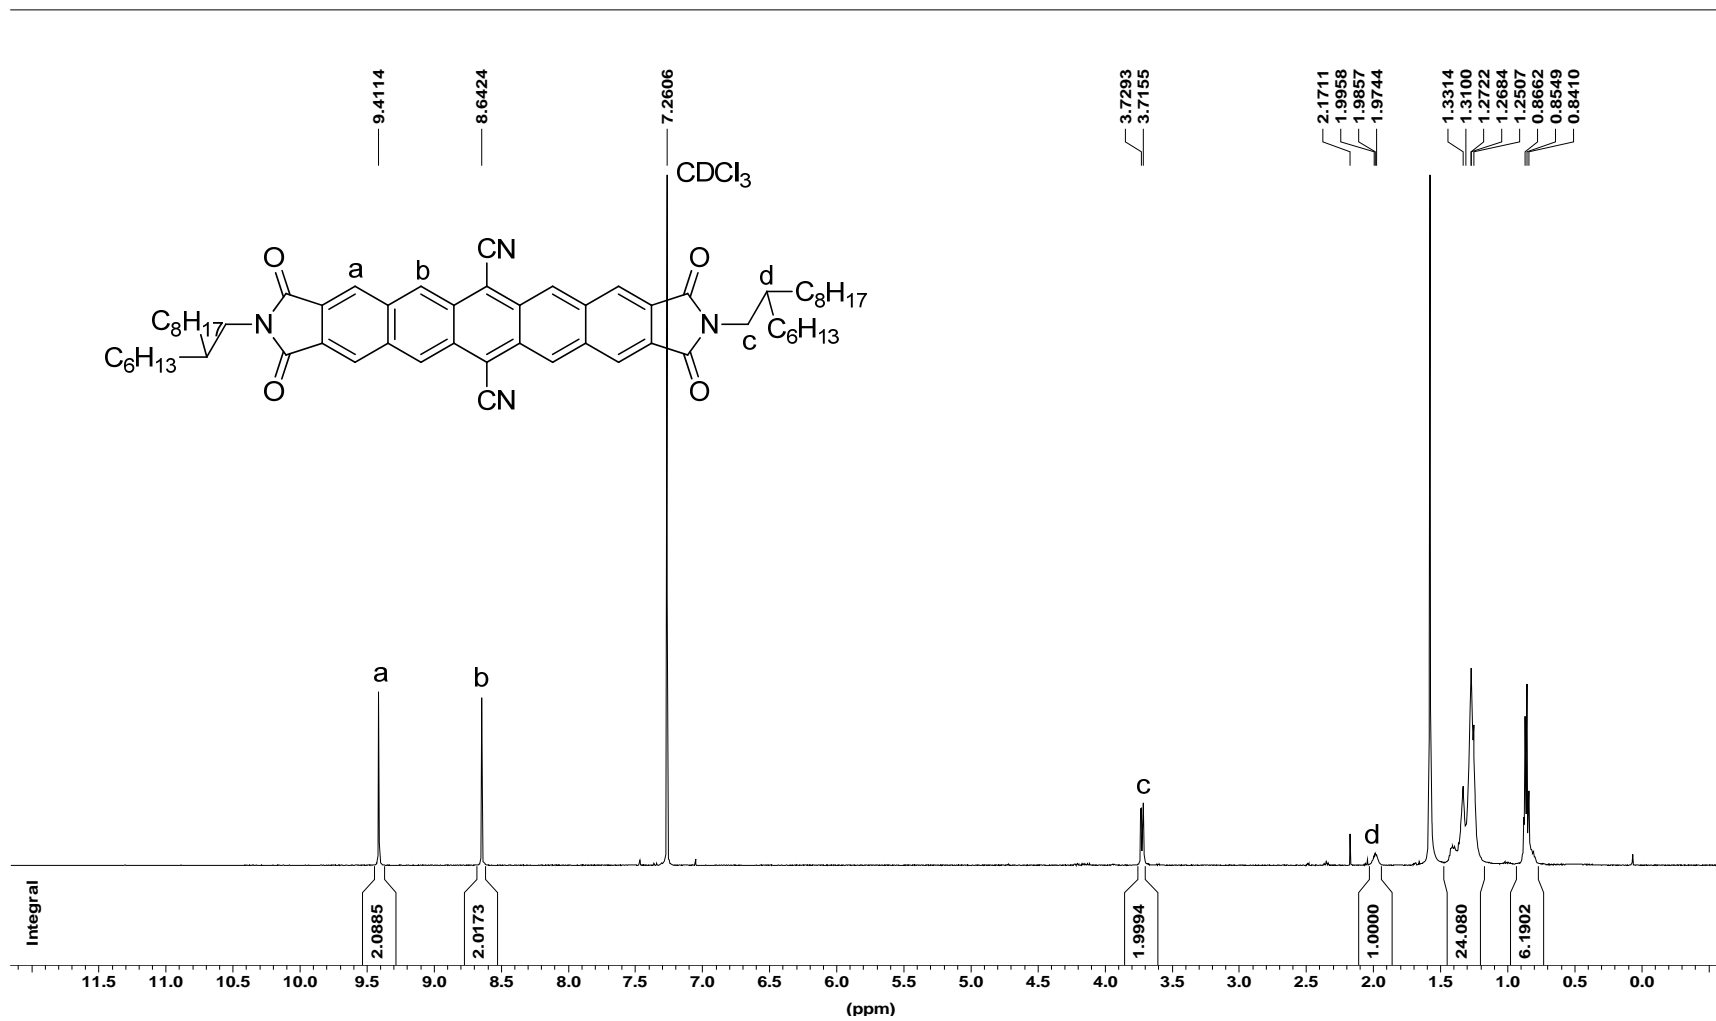

$^1\text{H}$  NMR (500 MHz) spectrum of compound **1** in  $\text{CDCl}_3$

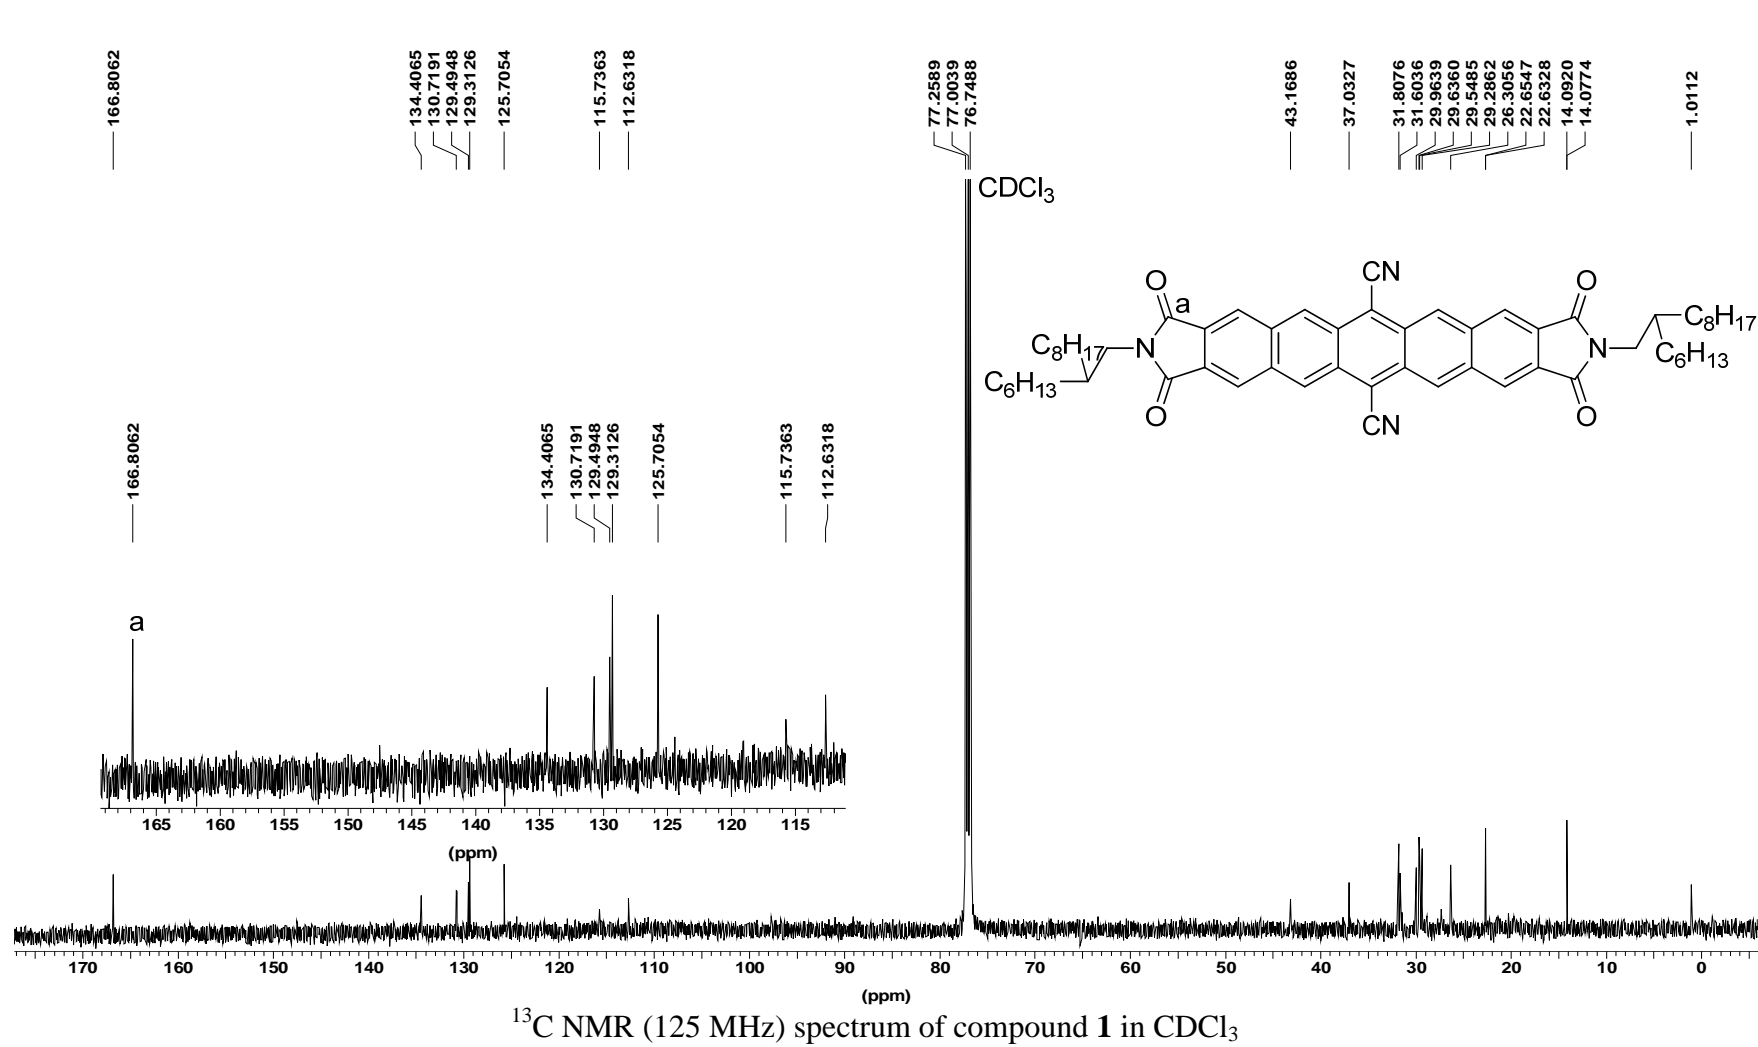

## 5. MALDI-TOF spectrum of compound 1

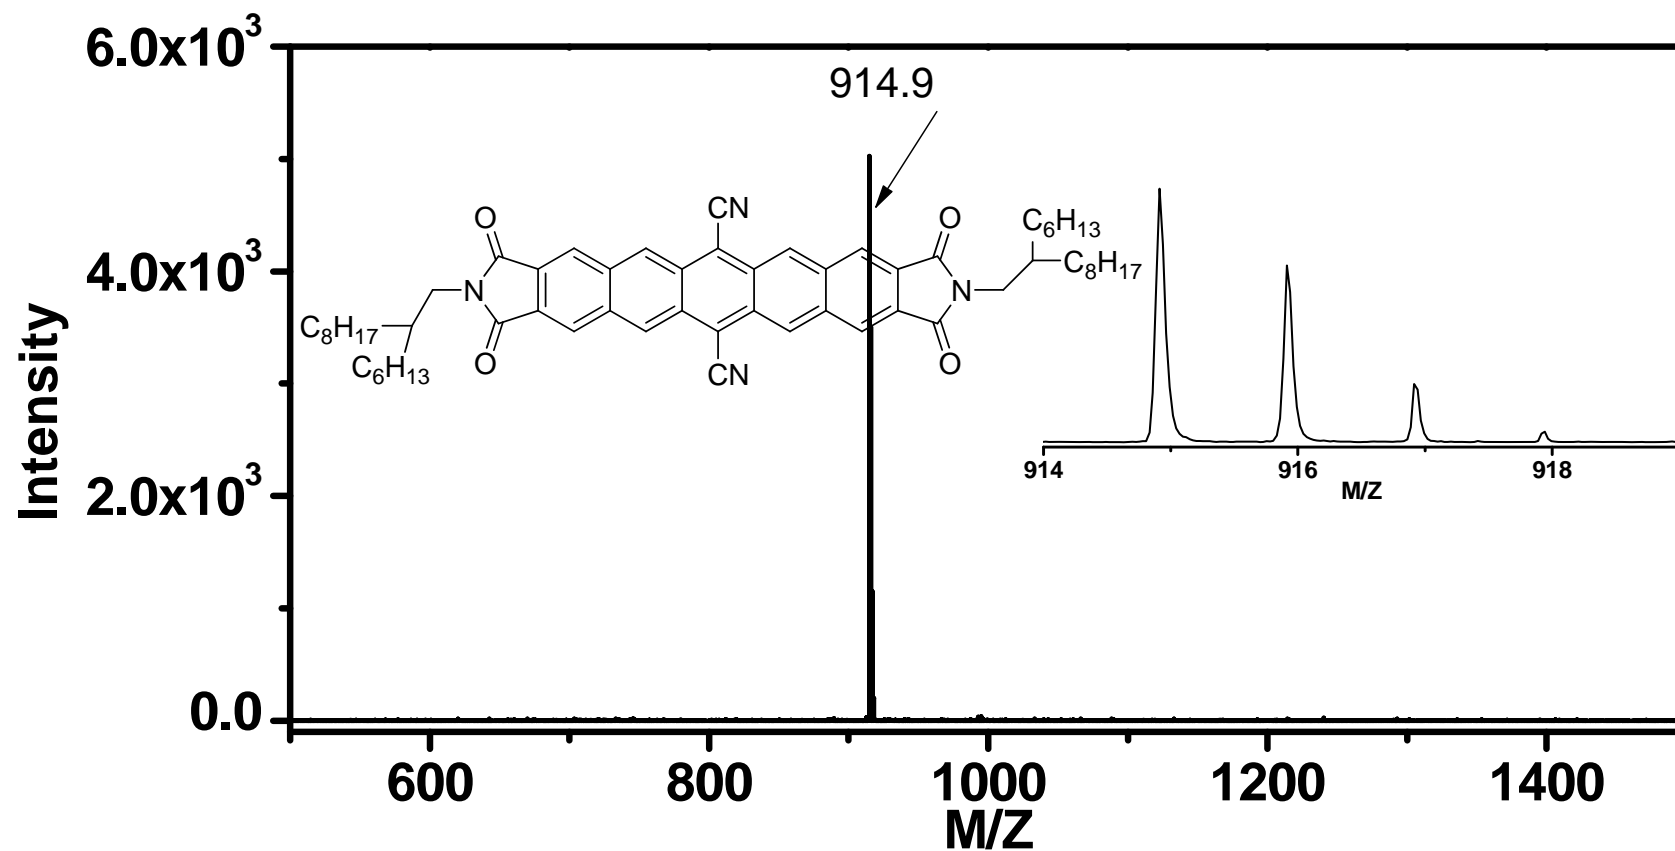

MALDI-TOF spectrum of compound 1.
